# Supplementary material for: Photodynamic therapy of oral lichen planus
Source: Royal Society of Chemistry journal article supplement (doi:10.1039/d0pp00249f), 2020-09-09
Supplement: d0pp00249f1.pdf [file d0pp00249f1.pdf]

## Appendix 1

### Documentation of literature search

The following databases were searched:

| Database                   | Number of retrieved references |
|----------------------------|--------------------------------|
| Medline and Embase (Ovid): | 84                             |

#### Medline and Embase (Ovid)

Date searched: 16.07.2020

Number of hits: 84

Database: Embase Classic+Embase <1947 to 2020 July 16>, Ovid MEDLINE(R) ALL <1946 to July 16, 2020>

Search Strategy:

- 1 photodynamic therapy/ or Photochemotherapy/ or Photosensitizing Agents/ (67244)
- 2 (photodynamic or photo dynamic or photosensitizing or photochemotherapy).tw. (56649)
- 3 1 or 2 (75038)
- 4 (oral adj3 lichen planus).tw. (6768)
- 5 oral lichen planus/ (5363)
- 6 4 or 5 (5876)
- 7 3 and 6 (131)
- 8 remove duplicates from 7 (84)
